# Supplementary material for: Hyperspectral Imaging during Normothermic Machine Perfusion—A Functional Classification of Ex Vivo Kidneys Based on Convolutional Neural Networks
Source: MDPI journal article supplement (doi:10.3390/biomedicines10020397), 2022-02-07
Supplement: s1 [file s1]

# Supplementary Material

## CNN Model Architecture

**Table S1.** KidneyResNet model architecture.

| Layer Name                 | Output Size               | Comment                                                                                                        |
|----------------------------|---------------------------|----------------------------------------------------------------------------------------------------------------|
| Convolution 2D-Input Layer | $64 \times 25 \times 25$  | [Convolutional layer 1] Kernel size 3, stride 2, variable drop-out-rate, activation ReLu                       |
| Residual block 1           | $64 \times 25 \times 25$  | [Convolutional layer 2] Kernel size 3, stride 1, variable drop-out-rate, activation ReLu                       |
|                            | $64 \times 25 \times 25$  | [Convolutional layer 3] Kernel size 3, stride 1, variable drop-out-rate, activation ReLu                       |
| Pooling layer 1            | $64 \times 25 \times 25$  | $2 \times 2$ Max pooling                                                                                       |
| Residual block 2           | $128 \times 25 \times 25$ | [Convolutional layer 4] Kernel size 3, stride 1, variable drop-out-rate, activation ReLu                       |
|                            | $128 \times 25 \times 25$ | [Convolutional layer 5] Kernel size 3, stride 1                                                                |
|                            | $128 \times 25 \times 25$ | [Convolutional layer 6] Identity convolution: kernel size 1, stride 1, variable dropout-rate, activation ReLu  |
| Pooling layer 2            | $128 \times 25 \times 25$ | $2 \times 2$ Max pooling                                                                                       |
| Residual block 3           | $256 \times 25 \times 25$ | [Convolutional layer 7] Kernel size 3, stride 1, variable drop-out-rate, activation ReLu                       |
|                            | $256 \times 25 \times 25$ | [Convolutional layer 8] Kernel size 3, stride 1                                                                |
|                            | $256 \times 25 \times 25$ | [Convolutional layer 9] Identity convolution: kernel size 1, stride 1, variable dropout-rate, activation ReLu  |
| Pooling layer 3            | $256 \times 25 \times 25$ | $2 \times 2$ Max pooling                                                                                       |
| Residual block 4           | $512 \times 25 \times 25$ | [Convolutional layer 10] Kernel size 3, stride 1, variable drop-out-rate, activation ReLu                      |
|                            | $512 \times 25 \times 25$ | [Convolutional layer 11] Kernel size 3, stride 1                                                               |
|                            | $512 \times 25 \times 25$ | [Convolutional layer 12] Identity convolution: kernel size 1, stride 1, variable dropout-rate, activation ReLu |
| Pooling layer 4            | $512 \times 25 \times 25$ | $1 \times 1$ Average pooling                                                                                   |
| Flatten                    | $320,000 \times 1$        |                                                                                                                |
| Fully connected layer      | 3                         | Activation Softmax                                                                                             |
